# Supplementary material for: p53-Mediated Radiosensitization of 177Lu-DOTATATE in Neuroblastoma Tumor Spheroids
Source: MDPI journal article supplement (doi:10.3390/biom11111695), 2021-11-15

**Table S1.** List of sequencing primers

| Human primers  |           |                            |
|----------------|-----------|----------------------------|
| Exon           | Direction | Sequence (5'-3')           |
| 2+3            | Forward   | CTGTCTCAGACACTGGCATGG      |
|                | Reverse   | GGCAAGGGGGACTGTA           |
| 4              | Forward   | GGACTGACTTTCTGCTCTTGTCTTT  |
|                | Reverse   | CAGAGATCACACATTAAGTGGGTAA  |
| 5              | Forward   | CTCTCTAGCTCGCTAGTGGGT      |
|                | Reverse   | CGAAAAGTGTTTCTGTCATCCAAAT  |
| 6              | Forward   | GCCATGGCCATCTACAAGCA       |
|                | Reverse   | TGGGGTTATAGGGAGGTCAAA      |
| 7              | Forward   | ACAGGTCTCCCCAAGG           |
|                | Reverse   | AAACTGAGTGGGAGCAGTAAGGAGA  |
| 8+9            | Forward   | GGACAAGGGTGGTTGGGAGTAGA    |
|                | Reverse   | CCCAATTGCAGGTAAACAGTCAAG   |
| 10             | Forward   | CAGTTTCTACTAAATGCATGTTGCT  |
|                | Reverse   | ATACACTGAGGCAAGAATGTGGTTA  |
| 11             | Forward   | CATCTTGATTTGAATCCCGTTGT    |
|                | Reverse   | CACCAGTGCAGGCCAACTTGTTTCAG |
| Murine primers |           |                            |
| Exon           | Direction | Sequence (5'-3')           |
| 2              | Forward   | GCATCCATACAGTACACAATCTCT   |
|                | Reverse   | CCAACACCATAACCATGTTTGAACA  |
| 3+4            | Forward   | GAATAACTCTCTGCTCTTGT       |
|                | Reverse   | AGGTCACACGAAAGACAATC       |
| 5              | Forward   | TTCCAGTACTCTCCTCCCCTCAA    |
|                | Reverse   | AGGCTGCCAGTCCTAACCCACAG    |
| 6              | Forward   | CATCTCCCGGCTTCTGACTTA      |
|                | Reverse   | AGTCTAGGCTGGAGTCAACTG      |
| 7              | Forward   | GAGGTAGGGAGCGACTTCAC       |
|                | Reverse   | GCTGGGGAAGAAACAGGCTAACCT   |
| 8+9            | Forward   | GGGCCCAGCTTTCTTACTGC       |
|                | Reverse   | AGACAGAGGCAATAATGGGTACA    |
| 10             | Forward   | TGTCCAGTGCTTCCATCTCAC      |
|                | Reverse   | TCACTACAAAGGCTGAGCTGG      |
| 11             | Forward   | AGCTCCCATCACTTCATCCCTC     |
|                | Reverse   | CCTGGACTCAGGTGGGTACCT      |

**Table S2.** List of materials for western blot experiments

| Article                              | Ref. no.  | Company       |
|--------------------------------------|-----------|---------------|
| SureLock Tandem Midi Gel Tank        | STM1001   | Thermo Fisher |
| SureLock Tandem Midi Blot Module     | STM2001   | Thermo Fisher |
| NuPAGE MOPS Running buffer           | NP0001    | Thermo Fisher |
| NuPAGE 4-12% Bis-Tris Midi gel       | WG1403BOX | Thermo Fisher |
| Non-reducing loading sample buffer   | LC2570    | Thermo Fisher |
| NuPAGE sample reducing agent         | NP0009    | Thermo Fisher |
| iBright prestained protein ladder    | LC5615    | Thermo Fisher |
| PVDF membranes, 0.45 $\mu$ m         | STM2006   | Thermo Fisher |
| NuPAGE transfer buffer               | NP0006    | Thermo Fisher |
| Blocking buffer                      | 37565     | Thermo Fisher |
| Bovine Serum Albumin                 | A7906     | Sigma Aldrich |
| Pico PLUS Chemiluminescent substrate | 34577     | Thermo Fisher |
| Femto Chemiluminescent substrate     | 34094     | Thermo Fisher |

**Table S3.** p53 variants detected in the current study

| Cell line       | Exon number | Genomic description (hg 38) | Genomic description (GRCm39) | cDNA description* | Protein description | IARC ID | dbSNP     | Effect                                                                                                                          |
|-----------------|-------------|-----------------------------|------------------------------|-------------------|---------------------|---------|-----------|---------------------------------------------------------------------------------------------------------------------------------|
| NB1, NB2, SKNAS | Exon 4      | g.7676154G>C                | n.a                          | c.215C>G          | p.P72R              | 708     | rs1042522 | Validated SNP. Potentially functional polymorphism with reported significance in drug response. Benign, uncertain significance. |
| Neuro2a         | Exon 4      | n.a.                        | g.69478314C>T                | c.379 C>T         | p.T74T              | n.a.    | n.a.      | Silent variant                                                                                                                  |
| Neuro2a         | Exon 5      | n.a.                        | g.69479331G>C                | c.665 G>C         | p.V170L             | n.a.    | n.a.      | Hydrofobic to hydrofobic missense mutation in the DNA binding region                                                            |

\*According to IARC nomenclature for human TP53 variants, referring to the NM\_000546.6 and alignment to NM011640.3 for the mouse lines N1e and N2a



# Flow cytometry – cell cycle analysis – NB2

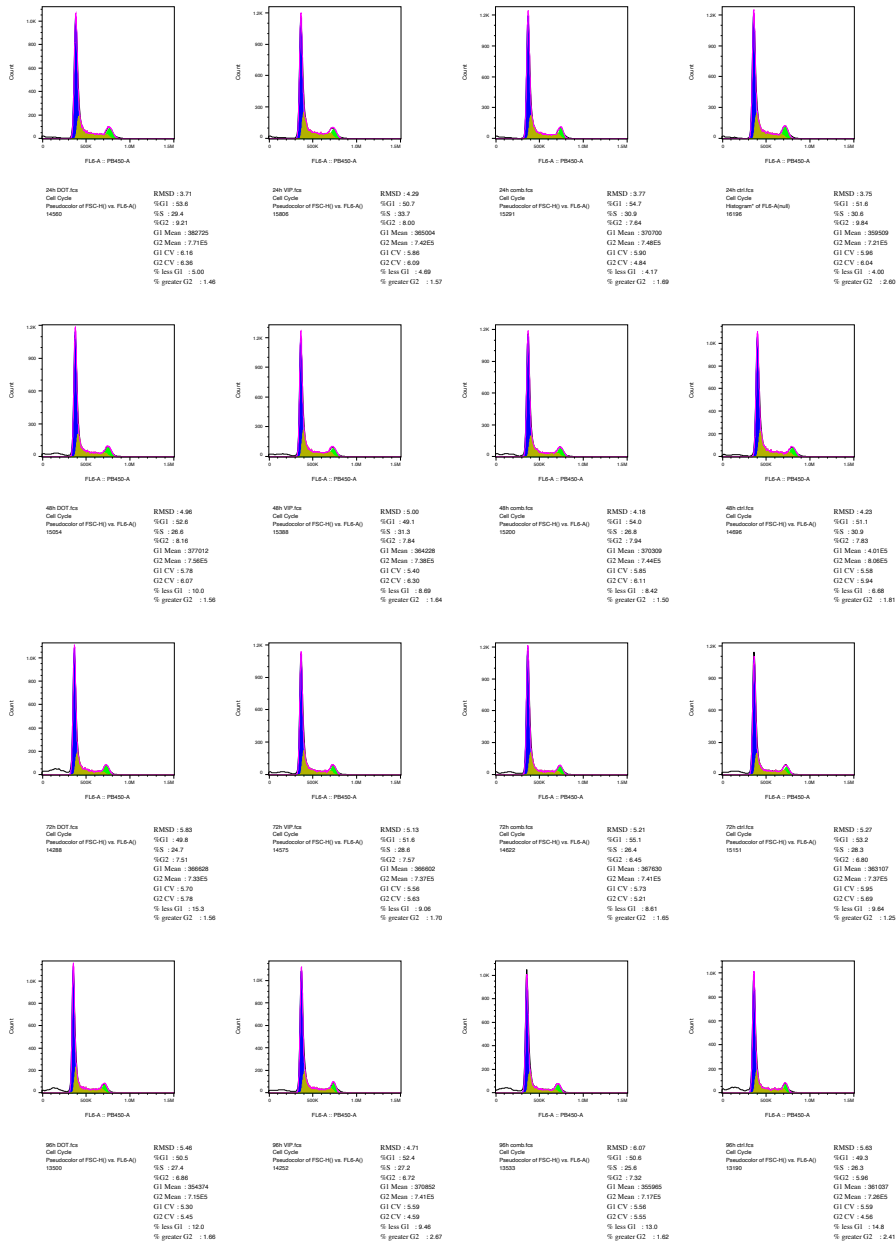

Supplement: s1 [file s1]
