# Supplementary material for: p53-Mediated Radiosensitization of 177Lu-DOTATATE in Neuroblastoma Tumor Spheroids
Source: MDPI journal article supplement (doi:10.3390/biom11111695), 2021-11-15
Supplement: s1 [file s1]

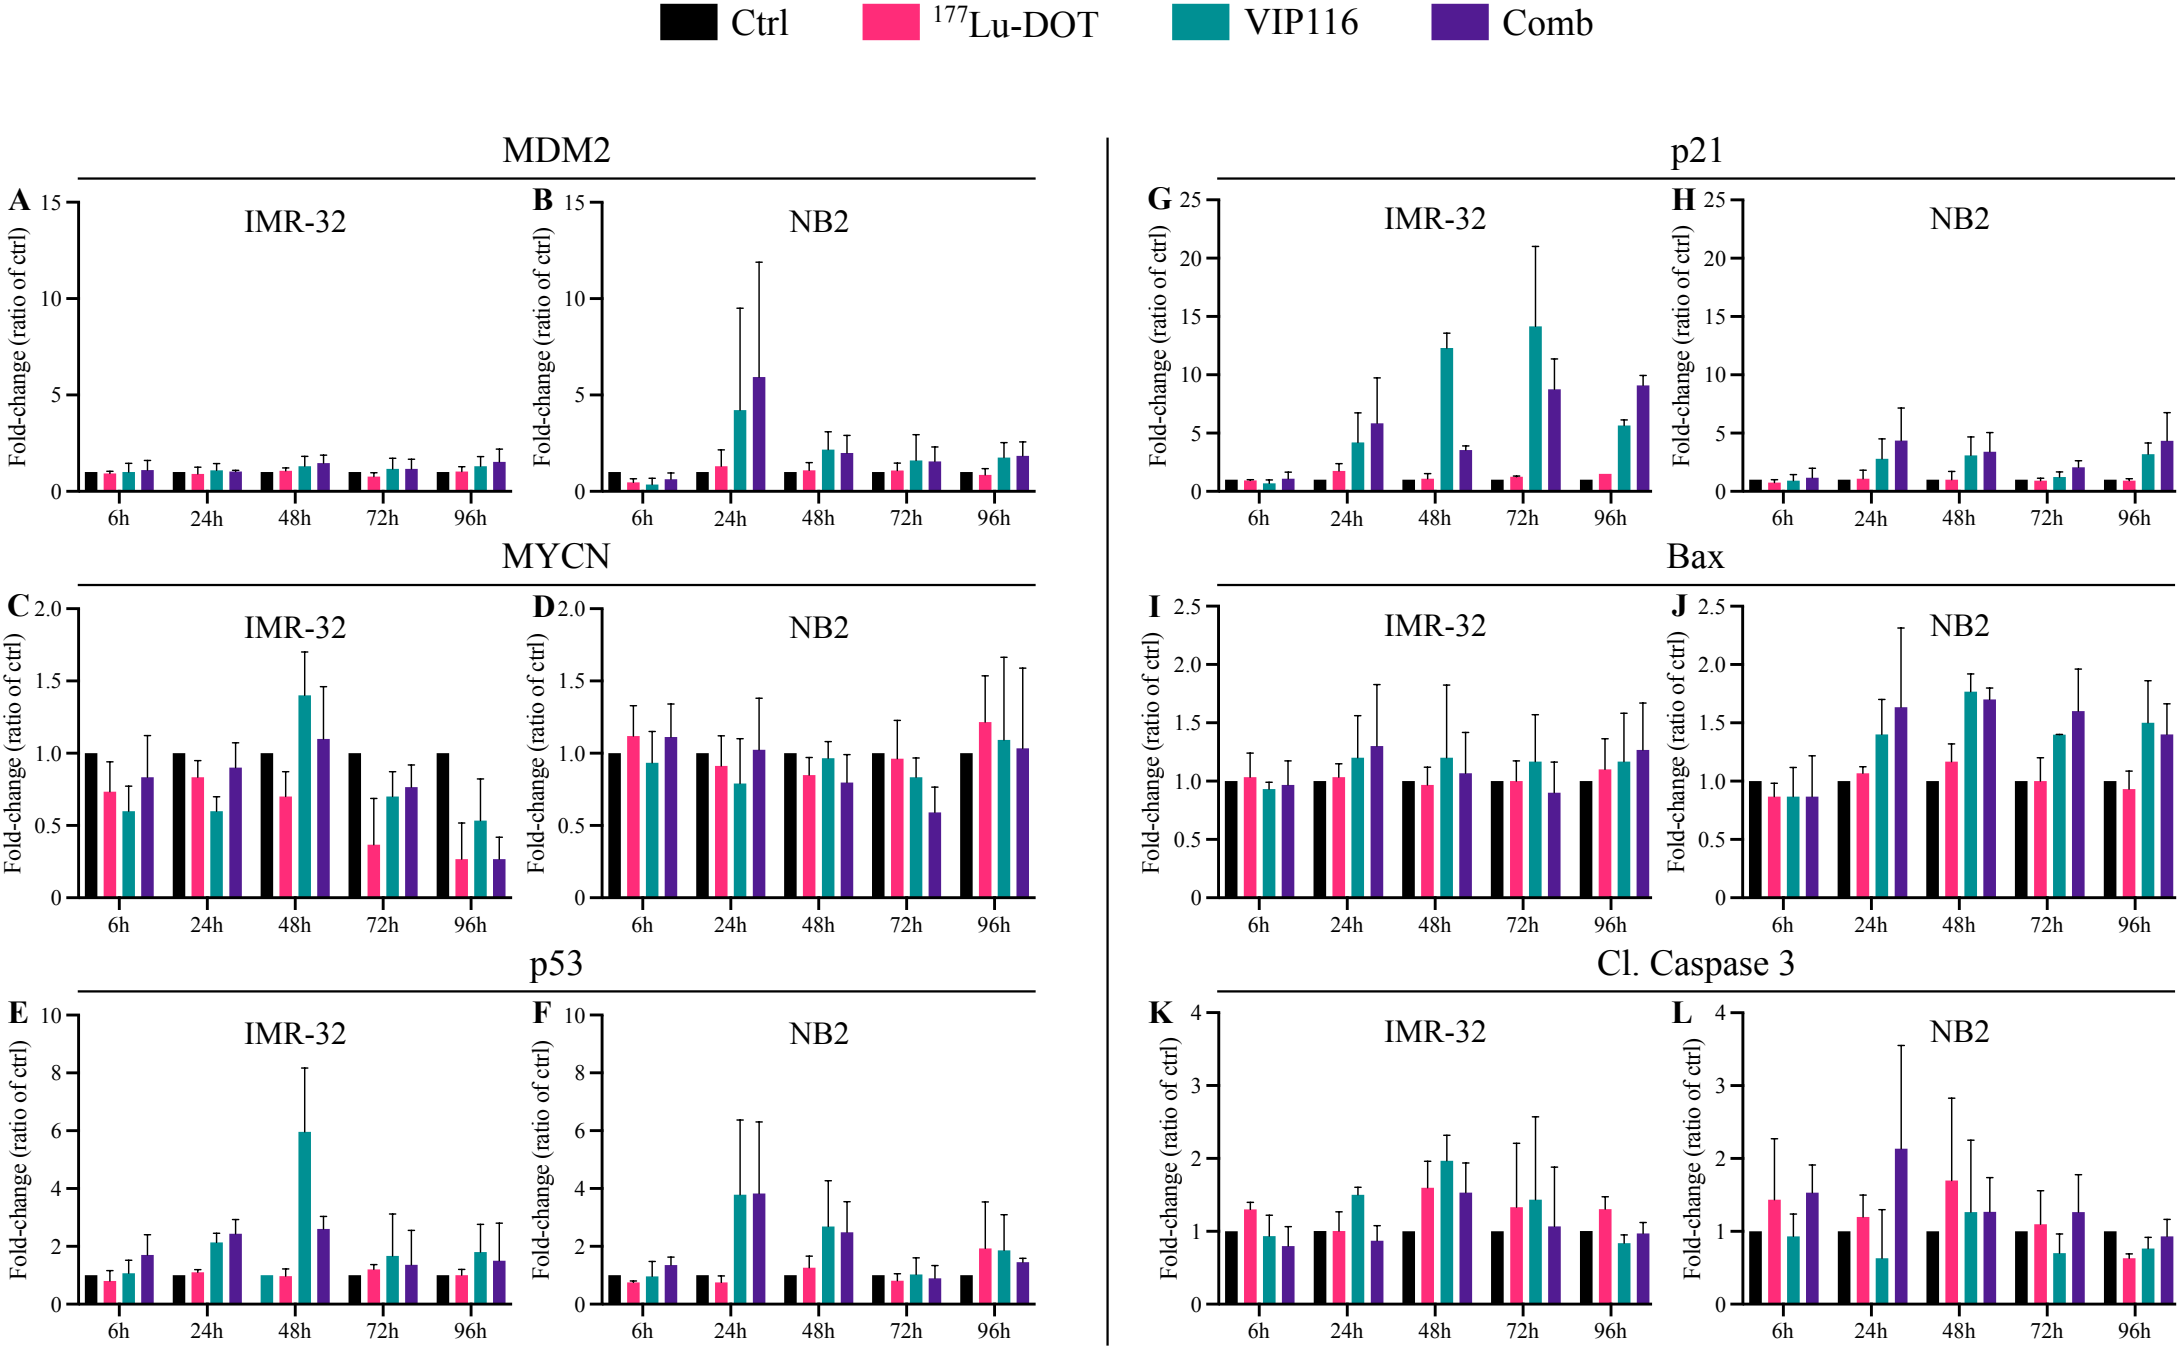

Figure S6: Quantification of western blots stained for (a-b) MDM2, (c-d) MYCN, (e-f) p53, (g-h) p21, (i-j) Bax and (k-l) cleaved caspase 3 (mean $\pm$ SD, N $\geq$ 3).
