# Supplementary material for: p53-Mediated Radiosensitization of 177Lu-DOTATATE in Neuroblastoma Tumor Spheroids
Source: MDPI journal article supplement (doi:10.3390/biom11111695), 2021-11-15
Supplement: s1 [file s1]

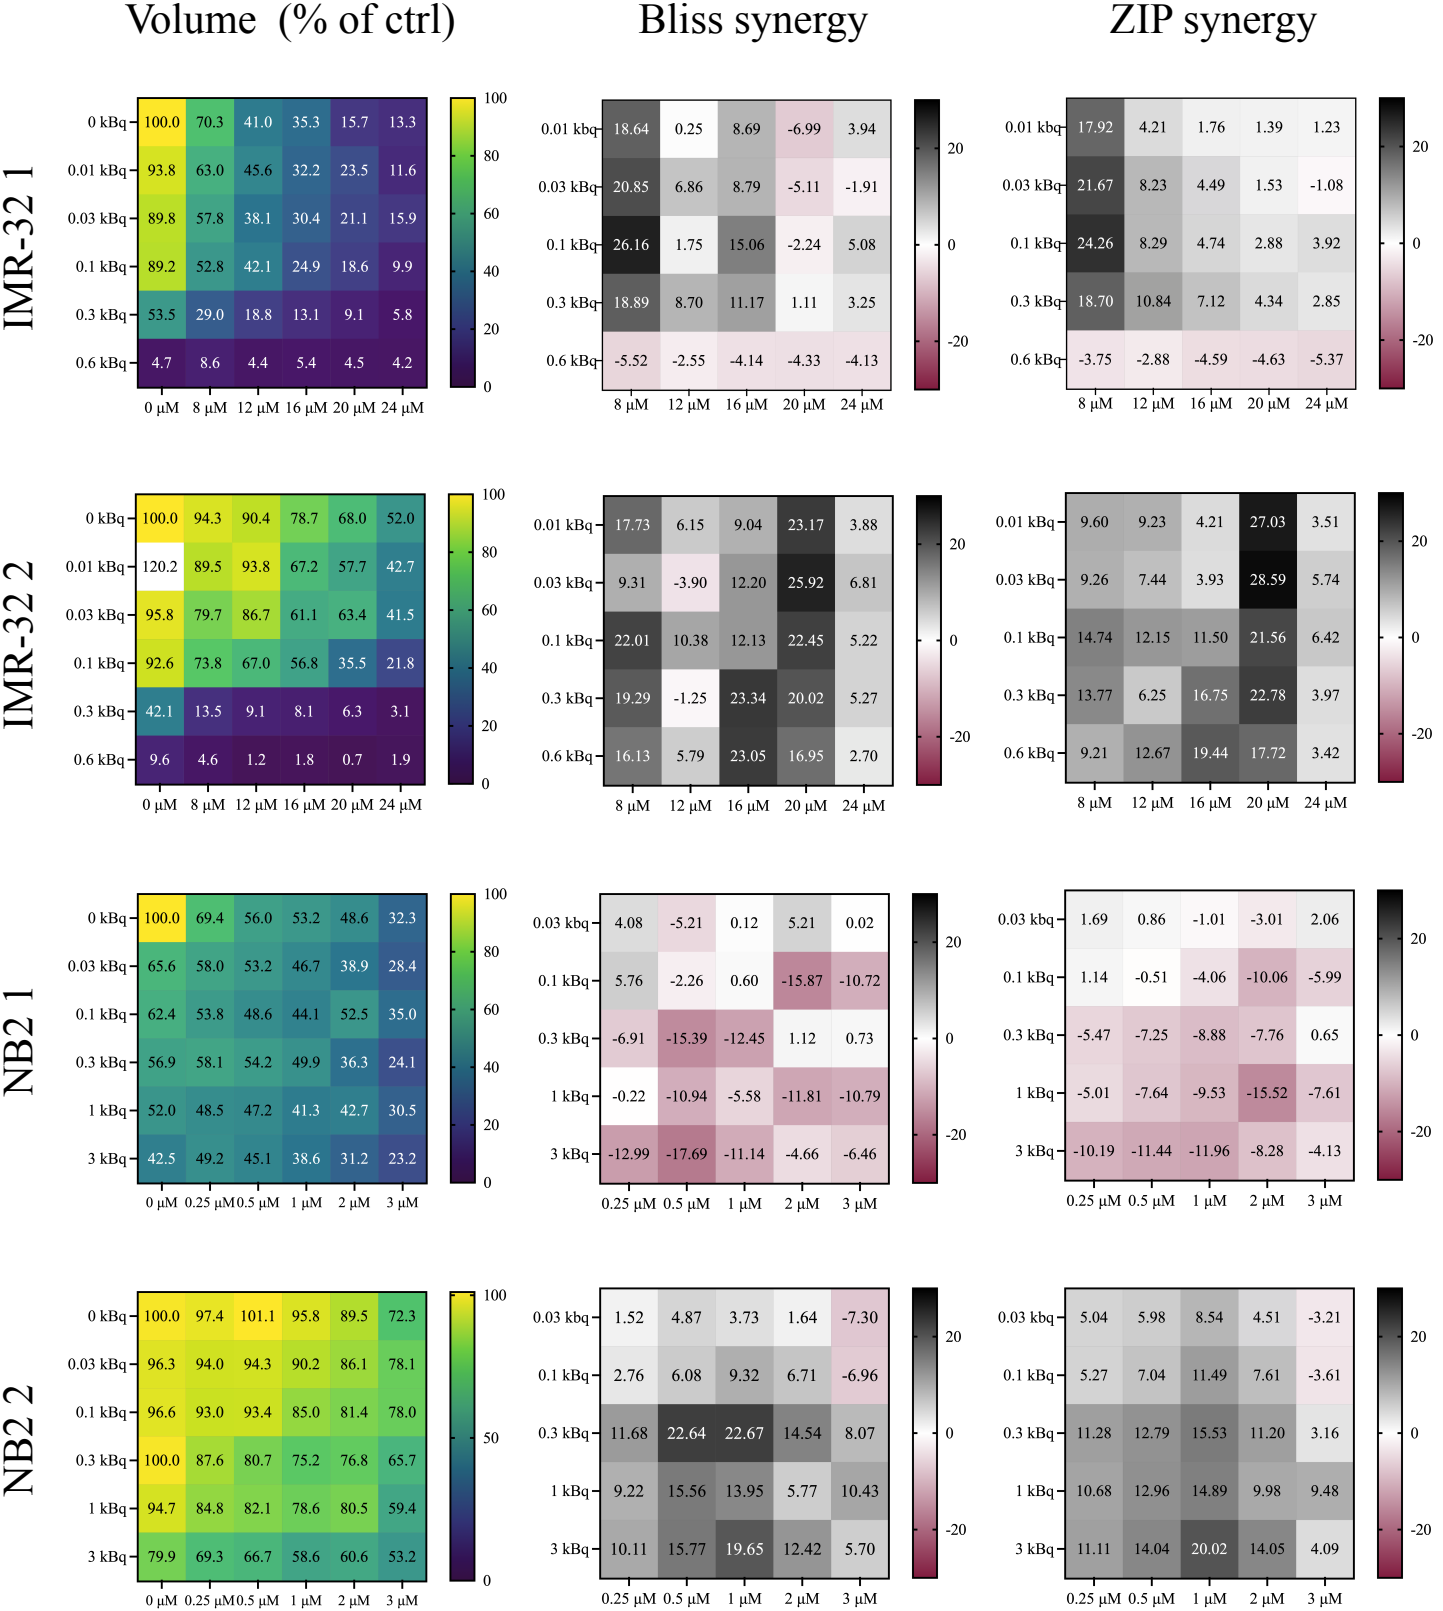

Figure S5: Spheroid combination therapy replicates for IMR-32 (1st and 2nd row) and NB2 (3rd and 4th row). Left panel: Average spheroid volume (% of ctrl) at last time point. Middle and left panel: synergy values for each combination, calculated with Bliss (middle panel) or ZIP (left panel) models.
