# Supplementary material for: p53-Mediated Radiosensitization of 177Lu-DOTATATE in Neuroblastoma Tumor Spheroids
Source: MDPI journal article supplement (doi:10.3390/biom11111695), 2021-11-15
Supplement: s1 [file s1]

**A****IMR-32**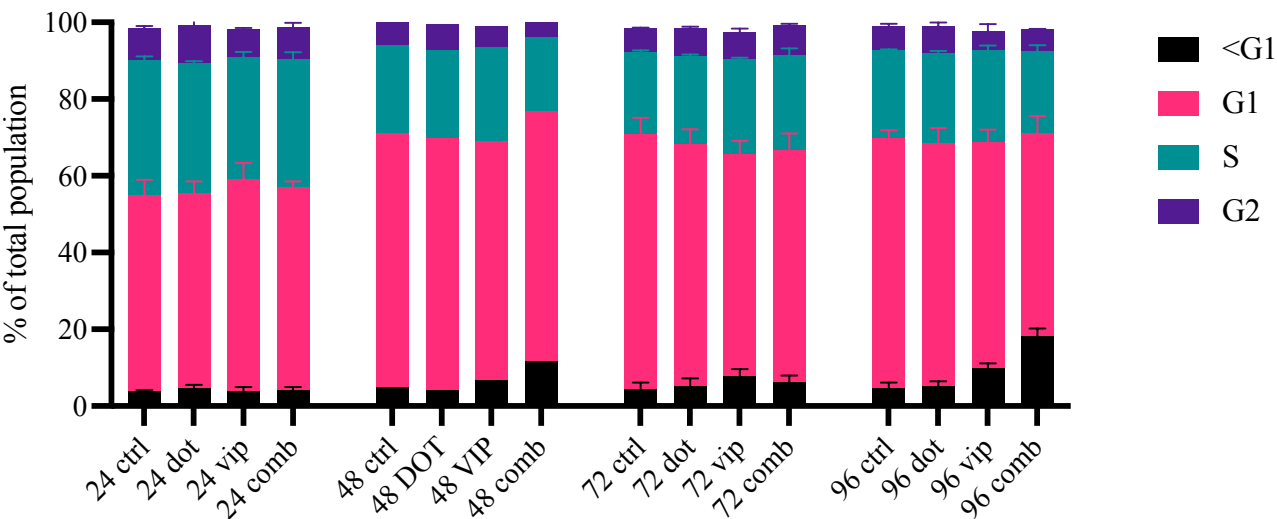**B****NB2**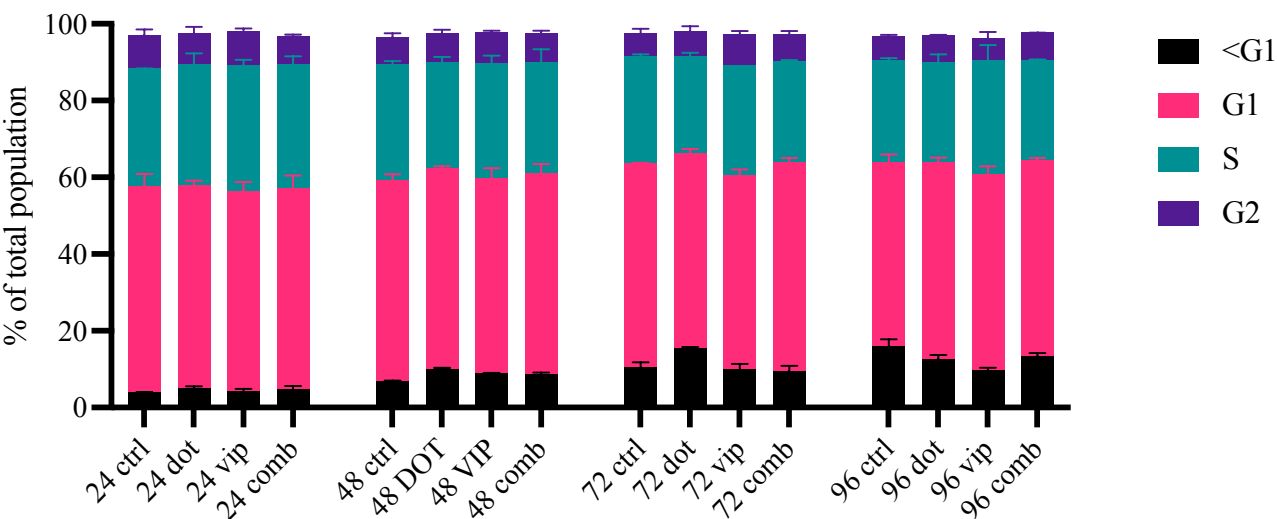

Figure S7: Cell cycle analysis. Distribution of cell cycle phases in (a) IMR-32 and (b) NB2 after treatment with  $^{177}\text{Lu}$ -DOTATATE and/or VIP116. Pooled data from 2 experiments (except for IMR-32 at 48 hours, with only 1 replicate), presented as mean $\pm$ SD.
