# Supplementary material for: p53-Mediated Radiosensitization of 177Lu-DOTATATE in Neuroblastoma Tumor Spheroids
Source: MDPI journal article supplement (doi:10.3390/biom11111695), 2021-11-15
Supplement: s1 [file s1]

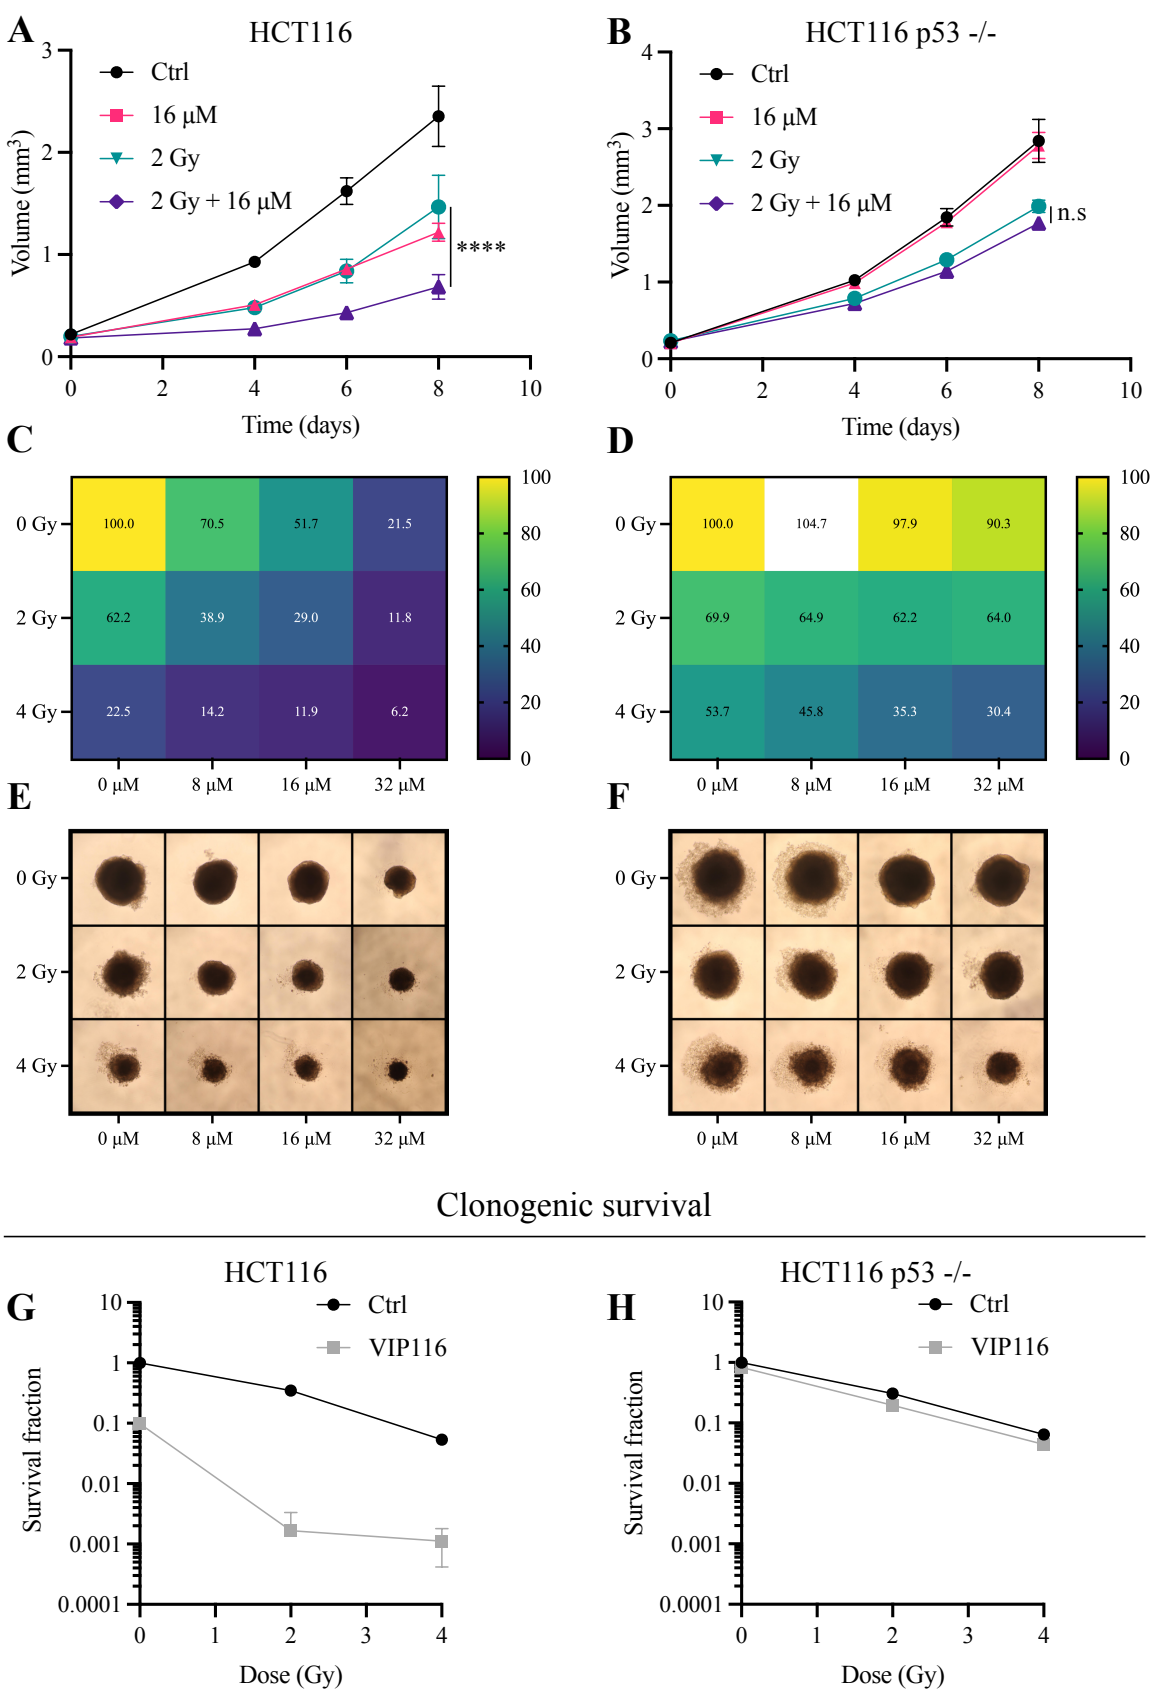

Figure S4: Specificity of VIP116. (a-f) Spheroids treated with VIP116 and/or external beam radiation on (a, c, e) HCT116 with wtp53 or (b, d, f) HCT116 p53 knock-out. (a-b) Representative graphs of (a) HCT116 or (b) HCT116 p53-/- spheroids treated with 16  $\mu$ M VIP116 and/or 2 Gy radiation (mean $\pm$ SD, N=3). (c-d) Spheroid size (% of untreated control) of (c) HCT116 or (d) HCT116 p53-/- at day 8. (e-f) Representative (e) HCT116 or (f) HCT116 p53-/- spheroid images at day 8. (g-h) Clonogenic survival of (g) HCT116 or (h) HCT116 p53-/- treated with 0-4 Gy radiation and/or 16  $\mu$ M VIP116 (mean $\pm$ SD, N=3).
