# Supplementary material for: p53-Mediated Radiosensitization of 177Lu-DOTATATE in Neuroblastoma Tumor Spheroids
Source: MDPI journal article supplement (doi:10.3390/biom11111695), 2021-11-15
Supplement: s1 [file s1]

(a)

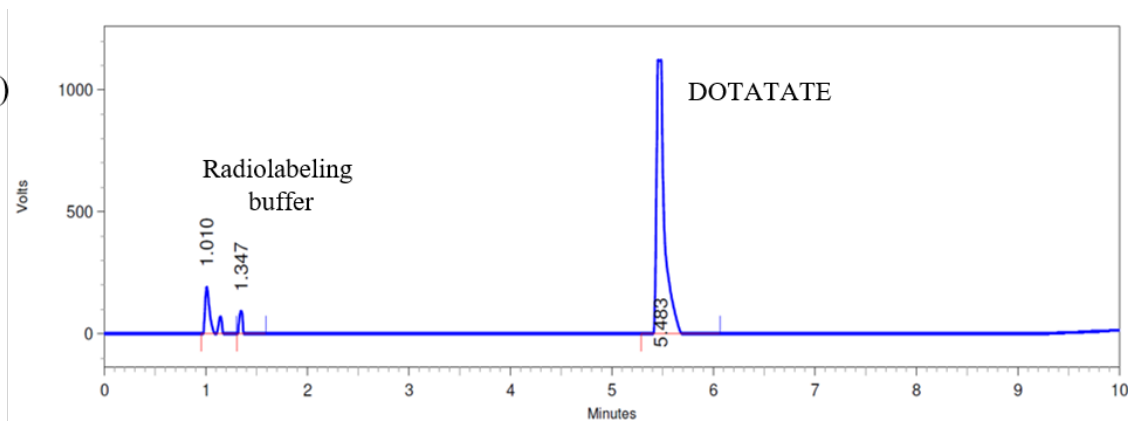

**AID-UV Results**

| Retention Time | Area     | Area % | Height  | Height % |
|----------------|----------|--------|---------|----------|
| 1.010          | 2839063  | 10.10  | 753569  | 13.46    |
| 1.347          | 798521   | 2.84   | 364161  | 6.51     |
| 5.483          | 24474604 | 87.06  | 4479014 | 80.03    |
| Totals         | 28112188 | 100.00 | 5596744 | 100.00   |

(b)

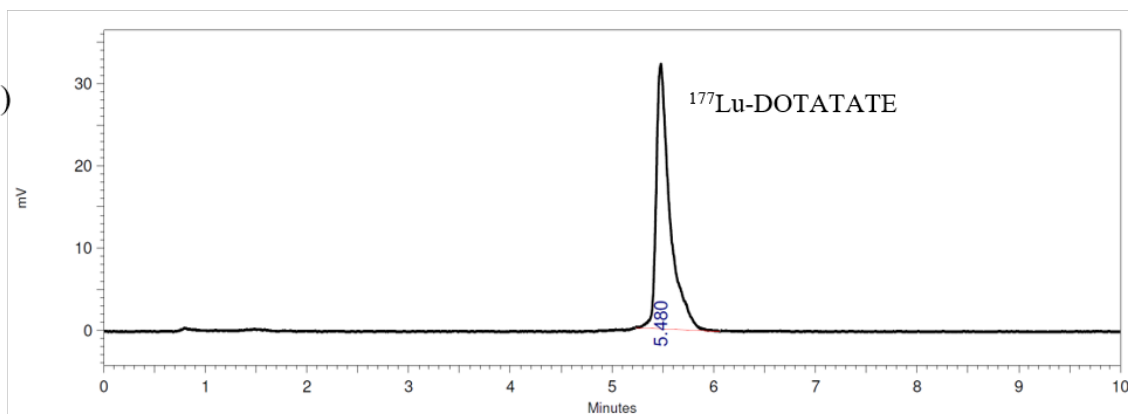

**AID-Radio Results**

| Retention Time | Area    | Area % | Height | Height % |
|----------------|---------|--------|--------|----------|
| 5.480          | 1200405 | 100.00 | 128938 | 100.00   |
| Totals         | 1200405 | 100.00 | 128938 | 100.00   |

Figure S1: HPLC chromatograms of (a) commercial DOTATATE (UV-detector) and (b)  $^{177}\text{Lu}$ -DOTATATE (Radio-detector).
