# Supplementary material for: p53-Mediated Radiosensitization of 177Lu-DOTATATE in Neuroblastoma Tumor Spheroids
Source: MDPI journal article supplement (doi:10.3390/biom11111695), 2021-11-15
Supplement: s1 [file s1]

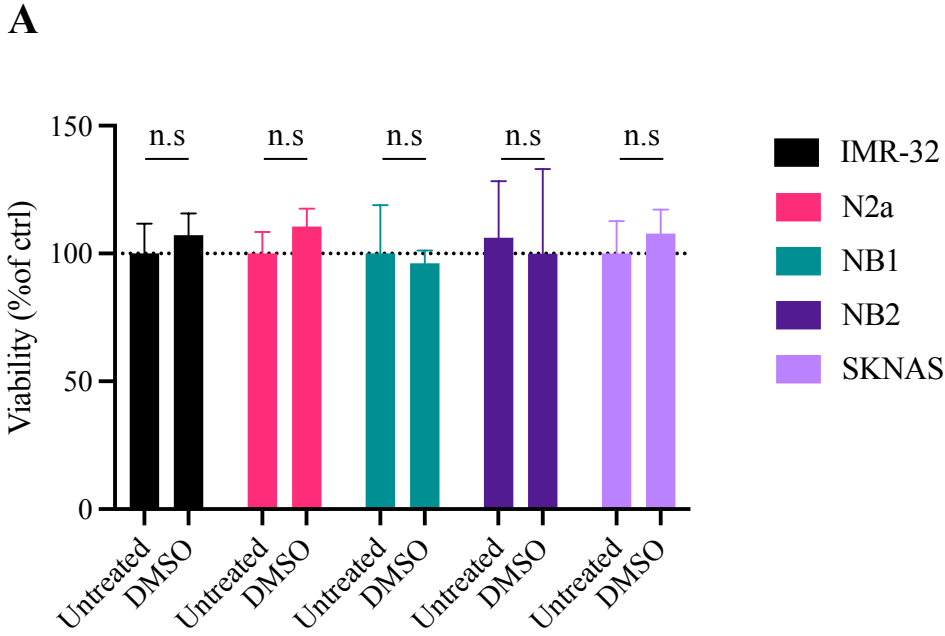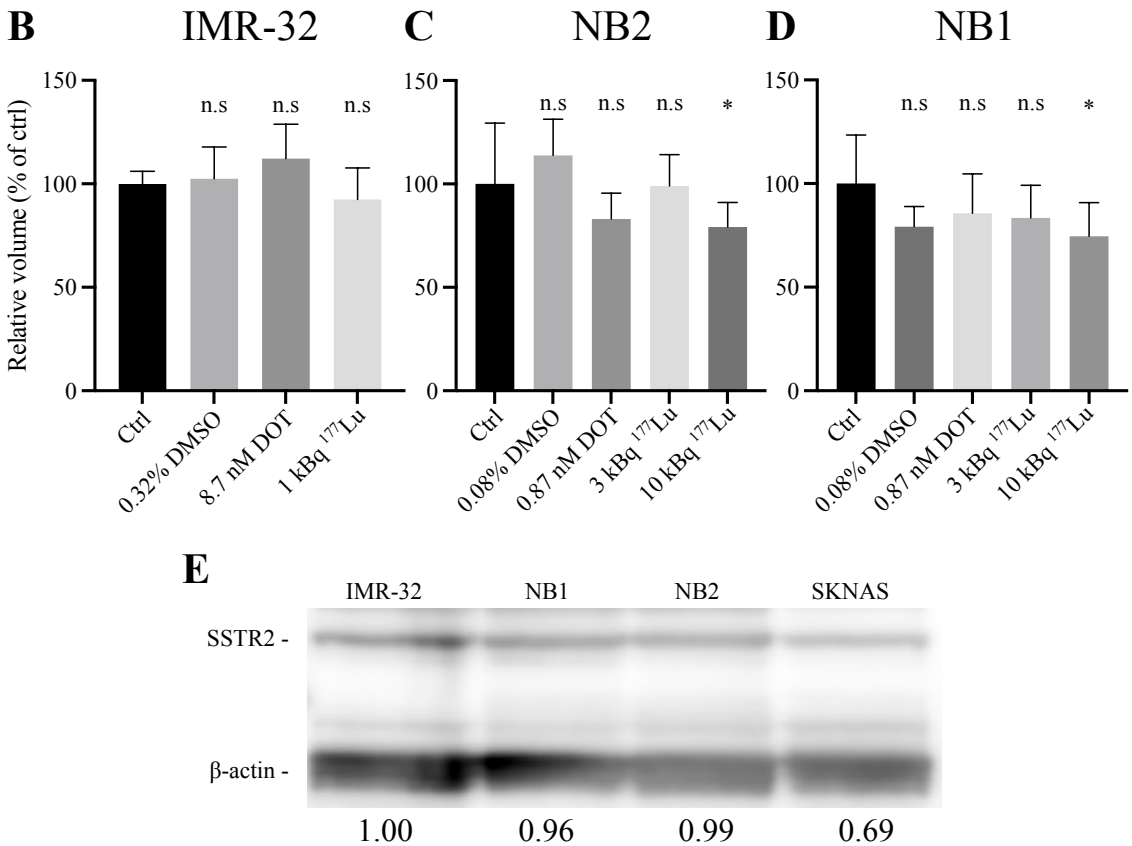

Figure S3: XTT and spheroid controls. (a) Viability of cells treated with DMSO corresponding to the highest concentration of VIP116 for each cell line. (b-d) Spheroid volume at the last investigated time point (% of untreated control) of spheroids treated with DMSO, unlabeled DOTATATE (DOT) and  $^{177}\text{Lu}$  for (b) IMR-32, (c) NB2 and (d) NB1. 0.08% DMSO corresponded to the same DMSO content as present in 8  $\mu\text{M}$  VIP116 and 0.32% corresponded to 32  $\mu\text{M}$ . 0.87 nM DOTATATE corresponded to the same molar concentration DOTATATE as present in 10 kBq  $^{177}\text{Lu}$ -DOTATATE and 8.7 nM corresponded to 100 kBq. (e) Representative western blot of SSTR2 in untreated IMR-32, NB1, NB2 and SKNAS lysates.
