# Supplementary material for: p53-Mediated Radiosensitization of 177Lu-DOTATATE in Neuroblastoma Tumor Spheroids
Source: MDPI journal article supplement (doi:10.3390/biom11111695), 2021-11-15
Supplement: s1 [file s1]

## Stability of $^{177}\text{Lu}$ -DOTATATE

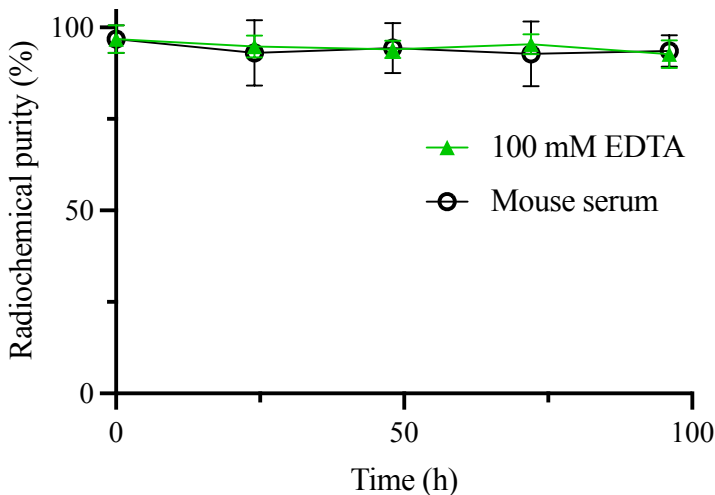

Figure S2: Stability of  $^{177}\text{Lu}$ -DOTATATE in the presence of 100 mM EDTA or mouse serum (mean $\pm$ SD, N=3).
